# Supplementary material for: Curcumin Enhances Fed-State Muscle Microvascular Perfusion but Not Leg Glucose Uptake in Older Adults
Source: MDPI journal article supplement (doi:10.3390/nu14061313), 2022-03-21
Supplement: s1 [file s1]

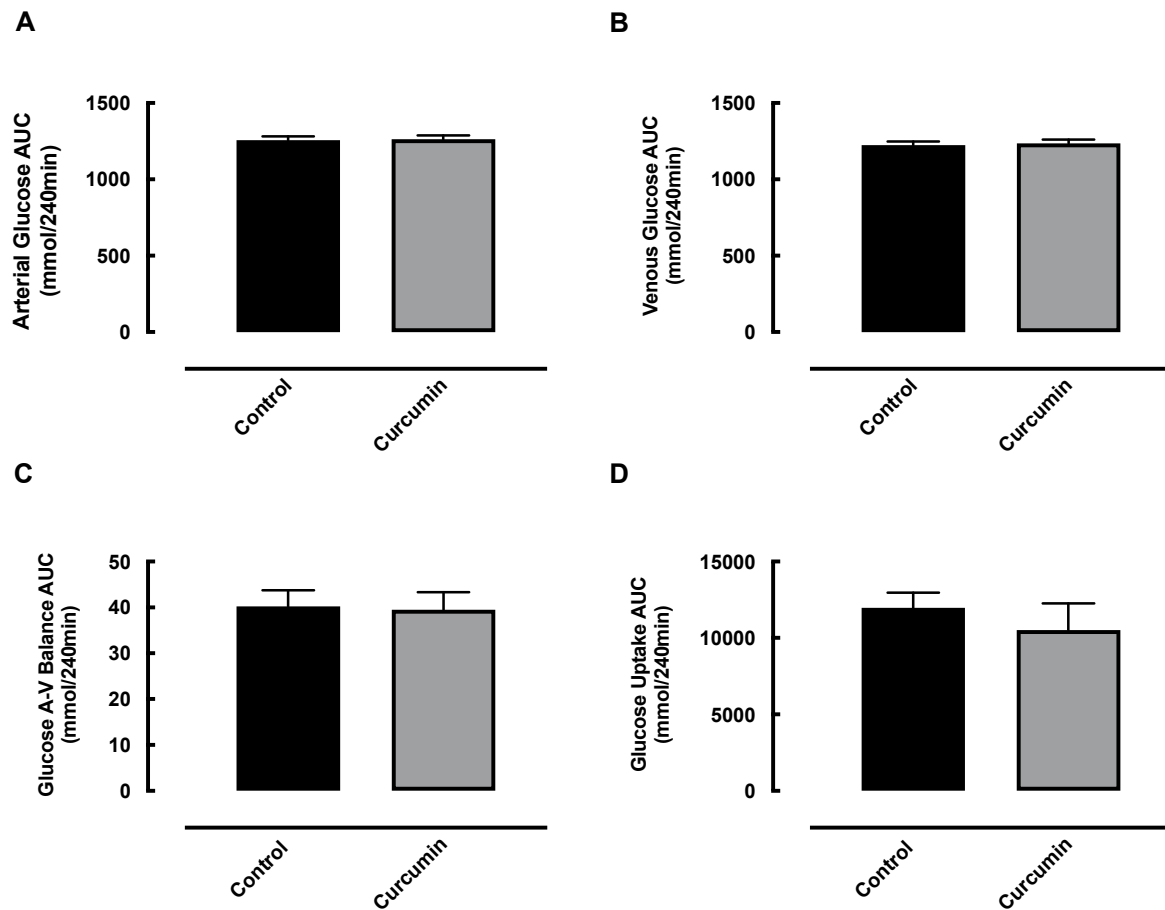

**Figure S1.** Arterial glucose (A), venous glucose (B), glucose arterio-venous balance (C) and glucose uptake (D) area under the curve in healthy older adults with/without curcumin, following oral nutritional supplement feeding. AUC, area under the curve; A-V, arterio-venous.
